# Supplementary material for: Time-restricted feeding’s effect on overweight and obese patients with chronic kidney disease stages 3-4: A prospective non-randomized control pilot study
Source: PubMed Central journal article supplement (PMC10111616; doi:10.3389/fendo.2023.1096093), 2023-03-22
Supplement: DataSheet_1.pdf [file DataSheet_1.pdf]

## Supplementary Material

Supplementary Figure 1.

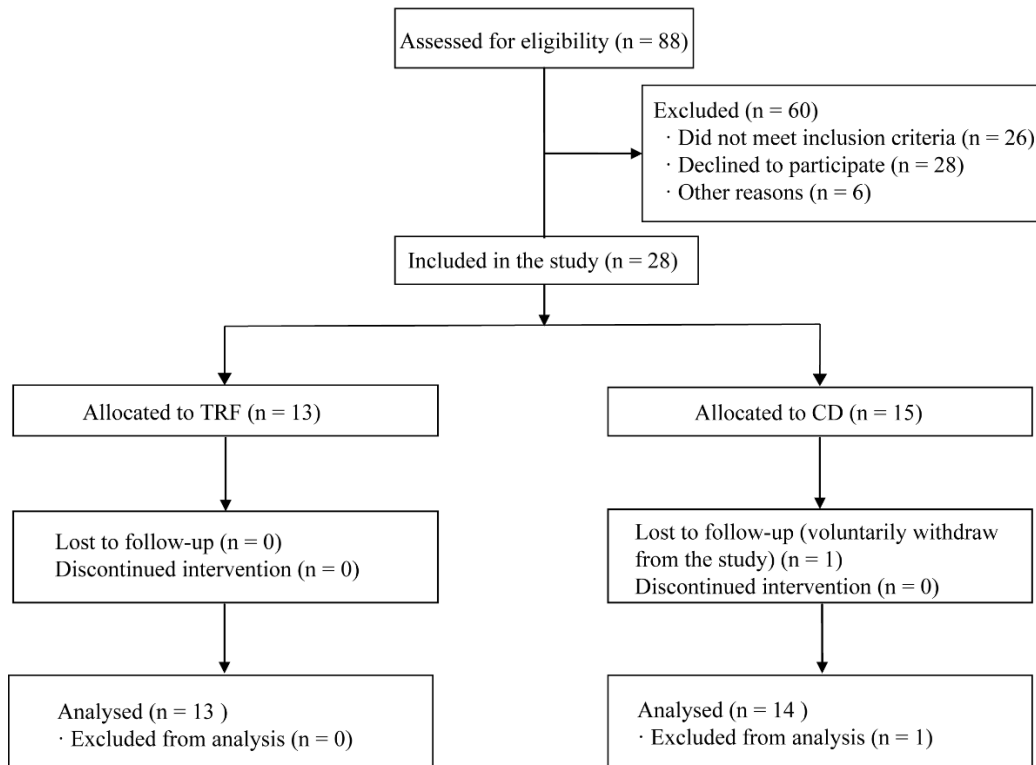

**Supplementary Figure 1. Study flow diagram.**

**Supplementary Table 1. Important biochemical indicators and reference value**

| Variable                                     | Reference value                      |
|----------------------------------------------|--------------------------------------|
| Serum creatinine ( $\mu\text{mol/L}$ )       | 41 - 81                              |
| Blood urea nitrogen ( $\text{mmol/L}$ )      | 3.10 - 8.80                          |
| Uric acid ( $\mu\text{mol/L}$ )              | 155 - 357 (female), 208 - 428 (male) |
| Cystatin-C ( $\text{mg/L}$ )                 | 0.54 - 1.15                          |
| Albumin ( $\text{g/L}$ )                     | 40.0 - 55.0                          |
| Total protein ( $\text{g/L}$ )               | 65.0 - 85.0                          |
| Alanine transaminase ( $\text{U/L}$ )        | 7 - 40                               |
| Aspartate transaminase ( $\text{U/L}$ )      | 13 - 35                              |
| Total cholesterol ( $\text{mmol/L}$ )        | 3.38 - 5.2                           |
| Triglycerides ( $\text{mmol/L}$ )            | 0.55 - 1.7                           |
| Low-density lipoprotein ( $\text{mmol/L}$ )  | 0.00 - 3.37                          |
| High-density lipoprotein ( $\text{mmol/L}$ ) | > 1.15                               |

|                                     |             |
|-------------------------------------|-------------|
| Interleukin 6 (pg/mL)               | 0.00 - 7.00 |
| Tumor necrosis factor alpha (pg/ml) | ≤ 8.10      |
| C-reactive protein (mg/L)           | 0.00 - 6.00 |

**Supplementary Table 2. Different intestinal flora between the two groups, before and after treatment**

|                        | <b>Microbiota</b>                    | <b>LAD</b>   | <b>p-value</b> |
|------------------------|--------------------------------------|--------------|----------------|
| Before intervention    | <i>Erysipelotrichaceae</i>           | 2.85         | <b>0.031</b>   |
|                        | <i>Clostridium_XVIII</i>             | 3.02         | <b>0.003</b>   |
|                        | <i>Erysipelotrichales</i>            | 2.85         | <b>0.031</b>   |
|                        | <i>Erysipelotrichia</i>              | 2.85         | <b>0.031</b>   |
| After intervention     | <i>Lachnospiracea_incertae_sedis</i> | 4.03         | <b>0.047</b>   |
|                        | <i>Akkermansia</i>                   | 4.56         | <b>0.028</b>   |
|                        | <i>Ruminococcaceae</i>               | 4.27         | <b>0.029</b>   |
|                        | <i>Alphaproteobacteria</i>           | 3.41         | <b>0.028</b>   |
|                        | <i>Oscillibacter</i>                 | 3.98         | <b>0.027</b>   |
|                        | <i>Verrucomicrobiae</i>              | 4.52         | <b>0.028</b>   |
|                        | <i>Clostridia</i>                    | 4.75         | <b>0.015</b>   |
|                        | <i>Lachnospiraceae</i>               | 4.57         | <b>0.013</b>   |
|                        | <i>Verrucomicrobiales</i>            | 4.48         | <b>0.028</b>   |
|                        | <i>Clostridiales</i>                 | 4.75         | <b>0.015</b>   |
|                        | <i>Verrucomicrobiaceae</i>           | 4.49         | <b>0.028</b>   |
|                        | <i>Anaerotruncus</i>                 | 2.21         | <b>0.016</b>   |
| <i>Verrucomicrobia</i> | 4.46                                 | <b>0.028</b> |                |

*p* values < 0.05 are in boldface.

**Supplementary Table 3. Walking steps for patients in both groups**

| <b>Step count</b>    | <b>TRF (n = 13)</b> | <b>CD (n = 14)</b>  | <b>p-value</b> |
|----------------------|---------------------|---------------------|----------------|
| Weekday step count 1 | 8339(3,988, 9,782)  | 5399(4,059, 10,000) | 0.770          |
| Weekday step count 2 | 7500(3,173, 10,000) | 4250(2,875, 10,000) | 0.559          |
| Weekend step count   | 8565(5,696, 10,500) | 6741(4,009, 11,426) | 0.733          |

Data are shown as medians (25th-75th interquartiles). TRF: time-restricted feeding; CD: control diet.

**Supplementary Table 4. Discomfort symptoms VAS scores for both groups**

| <b>Symptoms</b> | <b>6 weeks</b>      |                    |                | <b>12 weeks</b>     |                    |                |
|-----------------|---------------------|--------------------|----------------|---------------------|--------------------|----------------|
|                 | <b>TRF (n = 13)</b> | <b>CD (n = 14)</b> | <b>p-value</b> | <b>TRF (n = 13)</b> | <b>CD (n = 14)</b> | <b>p-value</b> |
| hunger          | 4.0 (0.5, 5.0)      | 1.0 (0.8, 4.0)     | 0.167          | 3.0 (1.5, 6.0)      | 1.0 (0.0, 3.3)     | <b>0.041</b>   |
| fatigue         | 2.0 (0.0, 5.0)      | 1.0 (0.0, 3.3)     | 0.458          | 2.0 (0.0, 4.0)      | 2.0 (0.0, 4.3)     | 0.980          |
| satiety         | 4.0 (2.5, 4.5)      | 1.5 (0.8, 3.0)     | 0.055          | 2.0 (0.0, 2.5)      | 1.0 (0.0, 2.3)     | 0.312          |

|              |                |                |       |                |                  |       |
|--------------|----------------|----------------|-------|----------------|------------------|-------|
| flatulence   | 0.0 (0.0, 3.0) | 1.5 (0.0, 3.3) | 0.202 | 0.0 (0.0, 2.5) | 0.5 (0.0, 2.0) * | 0.662 |
| nausea       | 0.0 (0.0, 1.5) | 0.5 (0.0, 1.0) | 0.311 | 0.0 (0.0, 0.0) | 0.0 (0.0, 0.0)   | 0.387 |
| vomiting     | 0.0 (0.0, 0.0) | 0.0 (0.0, 1.0) | 0.222 | 0.0 (0.0, 0.0) | 0.0 (0.0, 0.0)   | 0.657 |
| constipation | 0.0 (0.0, 5.0) | 0.5 (0.0, 2.5) | 0.753 | 0.0 (0.0, 0.0) | 0.0 (0.0, 2.3)   | 0.506 |
| diarrhea     | 0.0 (0.0, 0.5) | 0.0 (0.0, 0.3) | 0.268 | 0.0 (0.0, 0.0) | 0.0 (0.0, 1.0)   | 0.268 |
| bad breath   | 0.0 (0.0, 1.5) | 1.0 (0.8, 3.3) | 0.133 | 0.0 (0.0, 1.0) | 1.0 (0.0, 2.0)   | 0.133 |
| dry mouth    | 2.0 (0.0, 5.0) | 1.0 (0.0, 2.3) | 0.278 | 0.0 (0.0, 2.5) | 0.5 (0.0, 1.0) * | 0.957 |
| dizziness    | 0.0 (0.0, 4.0) | 0.0 (0.0, 1.0) | 0.750 | 0.0 (0.0, 0.5) | 0.0 (0.0, 1.0)   | 0.507 |
| headache     | 0.0 (0.0, 1.5) | 0.0 (0.0, 1.0) | 0.809 | 0.0 (0.0, 0.0) | 0.0 (0.0, 1.0)   | 0.809 |
| weakness     | 1.0 (0.0, 5.5) | 0.0 (0.0, 1.0) | 0.066 | 0.0 (0.0, 1.5) | 0.0 (0.0, 1.3)   | 0.954 |
| irritability | 0.0 (0.0, 3.0) | 0.0 (0.0, 1.0) | 0.502 | 0.0 (0.0, 1.5) | 0.0 (0.0, 2.0)   | 0.338 |
| unhappiness  | 0.0 (0.0, 3.5) | 0.0 (0.0, 1.0) | 0.377 | 0.0 (0.0, 1.5) | 0.0 (0.0, 1.0)   | 0.593 |
| depression   | 0.0 (0.0, 1.5) | 0.0 (0.0, 0.3) | 0.815 | 0.0 (0.0, 0.5) | 0.0 (0.0, 1.0)   | 0.900 |
| anxiety      | 0.0 (0.0, 1.5) | 0.0 (0.0, 1.0) | 0.975 | 0.0 (0.0, 1.5) | 0.0 (0.0, 1.0)   | 0.718 |
| overeating   | 0.0 (0.0, 1.5) | 0.0 (0.0, 1.5) | 0.505 | 0.0 (0.0, 2.0) | 0.0 (0.0, 1.0)   | 0.935 |

Data are shown as medians (25th-75th interquartiles). VAS: visual analogue scale; TRF: time-restricted feeding; CD: control diet. \* represents a significant difference between the CD group before and after 6 and 12 weeks. *p* values < 0.05 are in boldface.
